# Supplementary material
Source: publisher figshare collection journal article supplement (https://acs.figshare.com/ndownloader/files/4159135)
Supplement: Supplementary file 1 [file 4159135]

# Crystallization kinetics of monosodium aluminate hydrate in concentrated sodium aluminate solutions

Shaowei You,<sup>†,‡,§</sup> Yifei Zhang,<sup>†,‡,\*</sup> Shaotao Cao,<sup>†,‡</sup> Fangfang Chen,<sup>†,‡</sup> and Yi Zhang<sup>†,‡</sup>

<sup>†</sup>National Engineering Laboratory for Hydrometallurgical Cleaner Production Technology, Beijing 100190, China

<sup>‡</sup>Key Laboratory of Green Process and Engineering, Institute of Process Engineering, Chinese Academy of Sciences, Beijing 100190, China

<sup>§</sup>Graduate University of Chinese Academy of Sciences, Beijing 100049, China

## Supporting Information

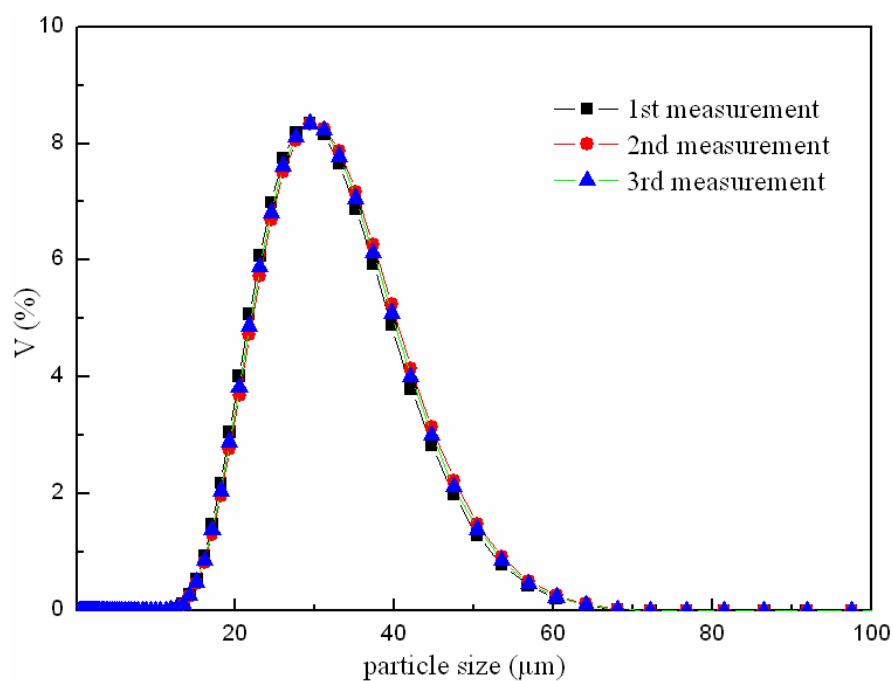

Fig S1. Three measurements of PSDs of produced crystals.

Table S1. 99% confidence intervals of nucleation rates correlation

| Variable | Value       | Lower Limit  | Upper Limit  |
|----------|-------------|--------------|--------------|
| $k_R$    | 3.04985E-18 | 3.04961E-18  | 3.05008E-18  |
| $i$      | -1.15000104 | -1.150002822 | -1.149999259 |
| $j$      | 1.060000833 | 1.059996861  | 1.060004805  |
